# Supplementary material for: Deleting Titin’s C-Terminal PEVK Exons Increases Passive Stiffness, Alters Splicing, and Induces Cross-Sectional and Longitudinal Hypertrophy in Skeletal Muscle
Source: Front Physiol. 2020 May 29;11:494. doi: 10.3389/fphys.2020.00494 (PMC7274174; doi:10.3389/fphys.2020.00494)
Supplement: TABLE S1 — Titin exon array. Mouse titin exon expression data of soleus and EDL muscle. Exon nomenclature according to the human titin sequence retreived from Ensmbl ENSG00000155657. [file Table_1.xlsx]

## Sheet: EDL
Mouse Titin Exon	ANOVAp	ShrunkANOVAp	MixANOVAp	PoolANOVAp	Unlog	Std. Er.
MTE1	0.671975	0.880472	0.886021	0.890862	-1.01995	0.0503369
MTE2	0.0331885	0.56698	0.661601	0.71267	-1.05502	0.00403186
MTE3	0.172836	0.534595	0.56045	0.58234	1.08878	0.0341603
MTE4	0.372967	0.595962	0.598549	0.601085	1.08328	0.0765802
MTE5	0.729066	0.984299	0.988153	0.990095	1.00172	0.00547223
MTE6	0.394352	0.313583	0.291782	0.266997	1.28125	0.25496
MTE7	0.741979	0.656637	0.631401	0.599533	-1.08373	0.270363
MTE8	0.937727	0.922981	0.916772	0.90877	-1.01607	0.234405
MTE9	0.690788	0.717654	0.704998	0.690461	1.06014	0.159613
MTE10	0.371947	0.38085	0.364079	0.34561	1.20098	0.174715
MTE11	0.528423	0.427929	0.401252	0.369888	-1.18327	0.265485
MTE12	0.033884	0.0460194	0.0445809	0.0430937	5.10325	0.125272
MTE13	0.251468	0.0951854	0.0829352	0.068413	2.88023	0.636291
MTE14	0.0506927	0.277102	0.309317	0.336696	-1.21564	0.0224804
MTE15	0.474433	0.761382	0.769925	0.777609	1.04107	0.0535833
MTE16	0.0353034	0.386164	0.456127	0.505533	1.11471	0.00869679
MTE17	0.0156984	0.254913	0.322818	0.372213	1.18169	0.00594049
MTE18	0.0569283	0.305313	0.339481	0.368276	1.19096	0.0226064
MTE19	0.0446709	0.647782	0.730391	0.773196	-1.04198	0.0041696
MTE20	0.904107	0.894369	0.887032	0.877917	-1.02169	0.203921
MTE21	0.279949	0.789397	0.814364	0.832138	-1.03028	0.0202469
MTE22	0.40677	0.560093	0.55555	0.550858	-1.09869	0.100874
MTE23	0.977306	0.979387	0.978302	0.977026	1.004	0.16138
MTE24	0.638808	0.733637	0.727237	0.720351	1.06179	0.135733
MTE25	0.0199586	0.240063	0.29404	0.335554	1.21663	0.00887159
MTE26	0.495461	0.70626	0.708332	0.710361	1.05554	0.0768799
MTE27	0.128839	0.350621	0.364705	0.377781	1.178	0.0484943
MTE28	0.318305	0.331542	0.316489	0.300088	1.24208	0.170858
MTE29	0.794738	0.742955	0.723802	0.699589	1.05801	0.243518
MTE30	0.60707	0.63802	0.623272	0.606533	1.08173	0.159699
MTE31	0.336653	0.57979	0.584783	0.589599	1.08662	0.0700305
MTE32	0.55895	0.550474	0.530812	0.508207	1.1137	0.187164
MTE33	0.548525	0.625032	0.614021	0.601963	1.08303	0.134102
MTE34	0.239907	0.699368	0.726128	0.7468	1.04911	0.0273742
MTE35	0.840944	0.891047	0.888455	0.88567	-1.02093	0.117135
MTE36	0.532419	0.709268	0.708655	0.708038	-1.05607	0.0871604
MTE37	0.0218236	0.206189	0.246389	0.278958	1.26595	0.0116673
MTE38	0.72966	0.961485	0.967118	0.970835	-1.00508	0.0161627
MTE39	0.903872	0.928427	0.926071	0.923465	1.01344	0.126566
MTE40	0.0596654	0.630679	0.703139	0.744776	1.04795	0.00635136
MTE41	0.759319	0.89197	0.894222	0.89634	1.01893	0.0681027
MTE42	0.161133	0.455836	0.475495	0.49306	1.12371	0.0435242
MTE43	0.395459	0.440151	0.425565	0.409654	1.16436	0.157119
MTE44	0.972582	0.973786	0.97228	0.970481	-1.00514	0.171645
MTE45	NA	NA	NA	NA	NA	NA
MTE46	0.778669	0.854792	0.852163	0.849387	-1.027	0.106059
MTE47	0.530568	0.461114	0.436385	0.407529	1.15994	0.235654
MTE48	0.78729	0.900652	0.902232	0.90374	-1.01698	0.0699708
MTE49	NA	NA	NA	NA	NA	NA
MTE50	0.474316	0.551547	0.539632	0.526678	-1.11064	0.139643
MTE51	0.545185	0.661979	0.655283	0.648168	1.07053	0.113372
MTE52	0.83476	0.830671	0.820363	0.807908	1.03499	0.186844
MTE53	0.342036	0.728414	0.745446	0.759624	1.0463	0.0389002
MTE54	0.0125806	0.381025	0.497866	0.564954	-1.11233	0.00303546
MTE55	0.756642	0.795622	0.787324	0.777924	1.04101	0.144215
MTE56	0.303534	0.789173	0.812094	0.828862	-1.03091	0.0226849
MTE57	0.610143	0.762454	0.761407	0.760346	-1.04615	0.0926479
MTE58	0.34288	0.652128	0.663286	0.673428	-1.06639	0.0554134
MTE59	0.96773	0.969356	0.967616	0.965542	1.0062	0.175827
MTE60	0.610549	0.733683	0.729514	0.725142	1.05223	0.104697
MTE61	0.422023	0.614451	0.613918	0.613383	-1.07981	0.0864928
MTE62	0.123056	0.653365	0.700435	0.732343	-1.05481	0.0150688
MTE63	0.403264	0.56463	0.5609	0.557071	1.09666	0.0977633
MTE64	0.14077	0.411933	0.43108	0.44833	1.1389	0.0421819
MTE65	0.958755	0.963128	0.961247	0.959046	1.00714	0.158288
MTE66	0.983528	0.994554	0.994821	0.995052	1.00089	0.0494496
MTE67	0.508086	0.380974	0.353545	0.321274	-1.22146	0.29603
MTE68	0.902647	0.979181	0.981186	0.982704	1.00311	0.0290294
MTE69	NA	NA	NA	NA	NA	NA
MTE70	0.20977	0.416366	0.421899	0.427262	1.14929	0.0686493
MTE71	0.210994	0.3496	0.347975	0.346335	1.20763	0.093662
MTE72	0.0581087	0.544068	0.614198	0.659269	-1.07859	0.00999041
MTE73	0.0754162	0.286455	0.307856	0.327012	1.21635	0.03363
MTE74	0.234603	0.415734	0.417325	0.418902	1.15911	0.082256
MTE75	0.273607	0.661485	0.681494	0.698312	1.05831	0.0374746
MTE76	0.213353	0.808807	0.839898	0.859513	1.02714	0.0134526
MTE77	0.704578	0.75519	0.746048	0.735796	-1.04989	0.140336
MTE78	0.847282	0.866282	0.859968	0.852666	1.02726	0.158621
MTE79	0.351007	0.547367	0.547456	0.547545	1.10322	0.0871544
MTE80	0.405973	0.583415	0.581319	0.57919	1.08974	0.0918658
MTE81	0.179509	0.406601	0.416448	0.425775	1.15006	0.0584338
MTE82	0.520424	0.703142	0.702873	0.702603	1.05732	0.0857383
MTE83	0.534006	0.565265	0.549285	0.531341	1.1053	0.160762
MTE84	0.1828	0.349251	0.351995	0.354698	1.19407	0.0755628
MTE85	0.448758	0.406672	0.385062	0.360514	1.18982	0.213315
MTE86	0.47053	0.909378	0.922766	0.931564	-1.012	0.0156799
MTE87	0.186742	0.542395	0.566093	0.586384	1.09057	0.0377818
MTE88	0.235966	0.226251	0.213292	0.199207	1.40709	0.191477
MTE89	0.0801399	0.31421	0.338449	0.359859	1.1903	0.0318052
MTE90	0.40569	0.667429	0.673656	0.679544	1.07465	0.076895
MTE91	0.742028	0.647716	0.621377	0.587961	1.09009	0.290103
MTE92	0.0626232	0.496736	0.559187	0.602616	1.08567	0.0117032
MTE93	0.788098	0.735381	0.715846	0.691204	1.05997	0.243029
MTE94	0.645482	0.851642	0.856525	0.860955	-1.02483	0.0568294
MTE95	0.276254	0.34151	0.331179	0.320233	1.2224	0.134256
MTE96	0.0766605	0.561171	0.621289	0.661787	1.06936	0.0117066
MTE97	0.861518	0.856273	0.847229	0.83623	-1.0295	0.189746
MTE98	0.277663	0.4238	0.42037	0.416872	1.15478	0.0967662
MTE99	0.160482	0.437575	0.455166	0.471102	1.12864	0.0449669
MTE100	0.127897	0.382572	0.401241	0.418144	1.15409	0.0421054
MTE101	0.506728	0.497963	0.47814	0.455596	1.13553	0.187279
MTE102	0.522037	0.769751	0.775599	0.781023	1.04173	0.0632072
MTE103	0.322033	0.631901	0.643582	0.654208	-1.06899	0.0533124
MTE104	0.501472	0.553364	0.539137	0.523404	1.10811	0.14879
MTE105	0.429203	0.496302	0.48336	0.469303	1.12942	0.140305
MTE106	0.608906	0.698468	0.690466	0.681787	1.0622	0.123418
MTE107	0.998127	0.997886	0.997732	0.997538	-1.00043	0.209491
MTE108	0.914412	0.894247	0.885799	0.874937	-1.02223	0.23456
MTE109	0.456403	0.559184	0.549708	0.539574	-1.10246	0.122666
MTE110	0.0168875	0.514075	0.636015	0.696131	1.0608	0.00225939
MTE111	0.0301853	0.51214	0.607846	0.662548	1.06689	0.00443274
MTE112	0.165578	0.31592	0.318032	0.320119	1.22251	0.0771326
MTE113	0.305073	0.424673	0.41805	0.411168	1.1579	0.109902
MTE114	0.305747	0.404093	0.395574	0.386631	1.17234	0.119503
MTE115	0.943763	0.903109	0.892535	0.877518	1.02176	0.350632
MTE116	0.818821	0.784432	0.768834	0.749264	-1.04699	0.226459
MTE117	0.793441	0.771475	0.756553	0.738257	-1.04936	0.206641
MTE118	0.983485	0.979667	0.978022	0.9759	-1.00419	0.232684
MTE119	0.973956	0.973757	0.97212	0.970133	1.0052	0.182843
MTE120	0.263043	0.489616	0.494822	0.499865	1.11689	0.069921
MTE121	0.129332	0.593273	0.635411	0.666592	-1.06813	0.0195865
MTE122	0.402147	0.346918	0.325813	0.301963	-1.28212	0.26234
MTE124	0.734293	0.710273	0.692695	0.671448	1.0647	0.203977
MTE125	0.921348	0.906319	0.899118	0.889953	1.01948	0.224148
MTE126	0.772674	0.791171	0.780924	0.769	1.04284	0.16223
MTE127	0.954846	0.939948	0.934698	0.927774	1.01267	0.255661
MTE128	0.681953	0.416205	0.377206	0.32747	-1.21595	0.516854
MTE129	0.882018	0.834814	0.820144	0.800707	-1.03641	0.275239
MTE130	0.579067	0.783713	0.786905	0.78996	-1.03856	0.0701656
MTE131	0.560762	0.708554	0.705593	0.70254	-1.05733	0.0974558
MTE132	0.948635	0.921101	0.913228	0.902404	1.01722	0.304629
MTE133	0.835338	0.785577	0.768375	0.746225	1.04764	0.25377
MTE134	0.364468	0.27341	0.25261	0.228989	-1.34156	0.273215
MTE135	0.56023	0.283302	0.251676	0.212978	-1.37421	0.554761
MTE136	0.732229	0.618442	0.589666	0.553021	1.09798	0.301469
MTE137	0.731812	0.846829	0.846377	0.84592	1.02765	0.0878253
MTE137.5	0.369991	0.313243	0.293163	0.270582	-1.27651	0.231348
MTE138	0.790052	0.778673	0.765105	0.748685	1.04711	0.194042
MTE139	0.54722	0.40205	0.372645	0.337556	-1.20742	0.31559
MTE140	0.82495	0.652657	0.617366	0.568261	-1.0931	0.455248
MTE141	0.60199	0.441074	0.409356	0.370724	-1.18923	0.3464
MTE142	0.516402	0.566047	0.55173	0.535849	-1.10374	0.149934
MTE143	0.703545	0.604542	0.577103	0.542839	-1.10485	0.286254
MTE144	0.942014	0.935889	0.931362	0.925718	1.01304	0.20458
MTE145	0.163085	0.314374	0.316755	0.319105	1.23156	0.0787049
MTE146	0.484451	0.504271	0.486968	0.467599	1.13016	0.168107
MTE147	0.350893	0.282895	0.263206	0.241047	-1.32016	0.246327
MTE148	0.00313326	0.0948928	0.134602	0.164198	-1.57213	0.00321254
MTE148.5	0.378584	0.551105	0.548567	0.545985	-1.1003	0.0932696
MTE149	0.591955	0.409572	0.377173	0.337711	-1.21478	0.37625
MTE150	0.576693	0.750101	0.750232	0.750364	-1.04676	0.0840842
MTE150.5	0.0368447	0.278609	0.321999	0.357056	-1.20925	0.0158824
MTE151	0.316276	0.331591	0.316722	0.300539	-1.24161	0.16927
MTE152	0.155377	0.323773	0.32862	0.333342	-1.21092	0.0687585
MTE153	0.475172	0.319128	0.292182	0.260517	-1.301	0.351107
MTE154	0.418689	0.21252	0.189212	0.161647	-1.53079	0.47446
MTE155	0.146831	0.185227	0.178708	0.171888	-1.51036	0.139694
MTE156	0.249221	0.209275	0.194863	0.178967	-1.46617	0.227875
MTE157	0.293564	0.166512	0.149735	0.130455	-1.70175	0.381099
MTE158	0.478453	0.573867	0.563813	0.552993	-1.09799	0.126028
MTE158.5	NA	NA	NA	NA	NA	NA
MTE159	0.45326	0.643912	0.64342	0.642926	-1.07786	0.0933449
MTE160	0.595314	0.867851	0.876162	0.88308	1.02242	0.0433476
MTE161	0.622673	0.453773	0.421088	0.380916	1.17597	0.347222
MTE162	0.126559	0.319725	0.330263	0.34023	1.20525	0.0542596
MTE163	0.295027	0.191576	0.174337	0.154751	1.5614	0.321241
MTE163.5	NA	NA	NA	NA	NA	NA
MTE164.5	0.219568	0.746756	0.777696	0.799498	-1.03788	0.0192702
MTE165.5	0.3901	0.538516	0.533509	0.528329	-1.10636	0.10252
MTE168	NA	NA	NA	NA	NA	NA
MTE169	0.951784	0.955906	0.953565	0.950806	-1.00859	0.162659
MTE169.5	0.231324	0.464264	0.471524	0.478479	-1.12551	0.0648601
MTE171	0.502521	0.53227	0.515908	0.497615	-1.11776	0.16189
MTE172	0.502521	0.53227	0.515908	0.497615	-1.11776	0.16189
MTE173	0.416309	0.450738	0.435073	0.417851	-1.15425	0.158617
MTE182	0.0889248	0.173353	0.174251	0.175143	-1.47914	0.0794036
MTE183	0.82548	0.674924	0.642511	0.597773	1.08423	0.414896
MTE184	NA	NA	NA	NA	NA	NA
MTE185	0.394615	0.286069	0.263587	0.237825	-1.32564	0.290252
MTE186	0.575075	0.64687	0.635925	0.623881	-1.07693	0.135664
MTE187	NA	NA	NA	NA	NA	NA
MTE188	NA	NA	NA	NA	NA	NA
MTE189	0.165868	0.568453	0.599166	0.624054	-1.0795	0.0294239
MTE190	0.35778	0.61502	0.621117	0.62693	-1.07611	0.0666385
MTE191	0.938305	0.954269	0.952767	0.951106	-1.00882	0.130329
MTE192	0.82548	0.674924	0.642511	0.597773	1.08423	0.414896
MTE193	NA	NA	NA	NA	NA	NA
MTE194	0.394615	0.286069	0.263587	0.237825	-1.32564	0.290252
MTE195	0.575075	0.64687	0.635925	0.623881	-1.07693	0.135664
MTE196	NA	NA	NA	NA	NA	NA
MTE197	NA	NA	NA	NA	NA	NA
MTE198	0.165868	0.568453	0.599166	0.624054	-1.0795	0.0294239
MTE199	0.35778	0.61502	0.621117	0.62693	-1.07611	0.0666385
MTE200	NA	NA	NA	NA	NA	NA
MTE201	0.235997	0.367063	0.363639	0.36015	-1.19009	0.0975822
MTE202	0.146121	0.359736	0.370863	0.381349	-1.18195	0.0563462
MTE203	NA	NA	NA	NA	NA	NA
MTE204	0.173036	0.264748	0.26074	0.256639	-1.30681	0.107591
MTE205	NA	NA	NA	NA	NA	NA
MTE206	0.202567	0.651652	0.681431	0.70465	-1.05876	0.0271347
MTE207	0.528839	0.663103	0.657932	0.652512	-1.06942	0.106021
MTE208	NA	NA	NA	NA	NA	NA
MTE209	0.227647	0.405788	0.407378	0.408953	-1.15913	0.0796057
MTE210	0.353491	0.808687	0.828139	0.842653	1.02921	0.0257716
MTE211	0.0851918	0.236149	0.246029	0.255375	1.30874	0.0522581
MTE212	0.803144	0.602016	0.563507	0.510596	-1.1128	0.482659
MTE212.5	0.349369	0.479267	0.472793	0.466055	-1.13541	0.11202
MTE213	NA	NA	NA	NA	NA	NA
MTE214	0.97359	0.950629	0.944842	0.936385	1.01114	0.385057
MTE215	0.689097	0.630809	0.607724	0.57959	-1.09269	0.240697
MTE216	0.931381	0.856311	0.838614	0.812197	-1.03415	0.447669
MTE217	0.889474	0.901221	0.896277	0.890507	1.01938	0.157895
MTE218	0.892778	0.968924	0.970906	0.972552	1.00478	0.0404478
MTE219	NA	NA	NA	NA	NA	NA
MTE220	0.479319	0.397655	0.373128	0.344771	1.20164	0.248321
MTE221	NA	NA	NA	NA	NA	NA
MTE222	0.604932	0.636868	0.622181	0.605525	1.08482	0.164318
MTE223	0.420965	0.286133	0.262043	0.234135	1.33213	0.321928
MTE224	0.139593	0.20562	0.201378	0.19702	1.4128	0.111106
MTE225	NA	NA	NA	NA	NA	NA
MTE226	0.0273824	0.214005	0.249828	0.279498	-1.28937	0.0157808
MTE227	0.039907	0.146809	0.15768	0.16774	-1.52661	0.0383095
MTE228	0.0820951	0.0351259	0.0309112	0.0260176	-14.913	0.505535
MTE229	0.0656985	0.0378863	0.0340949	0.0298214	-10.5608	0.352195
MTE230	0.036352	0.0365133	0.0344078	0.0321636	-8.89274	0.180216
MTE231	NA	NA	NA	NA	NA	NA
MTE232	0.0338997	0.0583808	0.057875	0.0573646	-3.53624	0.0971239
MTE233	0.0551433	0.0509861	0.0477044	0.0441757	-4.90292	0.199171
MTE234	0.0504324	0.0547161	0.0519245	0.0489711	-4.19386	0.164191
MTE235	0.882697	0.932854	0.932403	0.931943	1.01193	0.0917898
MTE236	0.919345	0.937059	0.934689	0.93203	-1.01191	0.134132
MTE237	0.54102	0.443831	0.417107	0.385603	1.17914	0.270531
MTE238	0.122725	0.313591	0.324254	0.334333	1.22872	0.0580055
MTE239	0.451307	0.530974	0.519197	0.506447	1.11436	0.133978
MTE240	0.314367	0.675023	0.691196	0.705162	1.05864	0.0442551
MTE241	0.503102	0.657522	0.653985	0.650335	-1.08123	0.113772
MTE242	0.0331066	0.52232	0.614763	0.668017	1.06776	0.00492353
MTE243	NA	NA	NA	NA	NA	NA
MTE244	0.201589	0.706766	0.739315	0.762964	1.04558	0.0210704
MTE245	0.436074	0.345194	0.321534	0.294363	1.24819	0.261288
MTE246	0.007286	0.402147	0.551259	0.62425	1.07683	0.00122223
MTE247	0.227488	0.560291	0.578293	0.594211	1.08527	0.0440762
MTE248	0.242035	0.511599	0.52225	0.53221	1.105	0.0575658
MTE249	0.166746	0.256438	0.252596	0.248668	1.30781	0.103788
MTE250	0.905963	0.916452	0.912291	0.90744	-1.01631	0.156875
MTE251	0.940925	0.973839	0.97433	0.974795	1.00507	0.0783548
MTE252	0.454348	0.813761	0.826883	0.837571	1.03162	0.0388914
MTE253	0.667295	0.637462	0.617201	0.593049	1.08561	0.20572
MTE254	0.728366	0.769346	0.760011	0.749441	1.04695	0.145609
MTE255	NA	NA	NA	NA	NA	NA
MTE256	0.795894	0.716894	0.693893	0.664139	1.0665	0.279715
MTE257	0.559249	0.542605	0.522166	0.498584	1.11738	0.193093
MTE258	0.862009	0.821971	0.80752	0.788856	1.03879	0.249301
MTE259	0.579531	0.616591	0.601915	0.585379	1.08787	0.156413
MTE260	0.709498	0.728125	0.715143	0.700095	1.05789	0.165411
MTE261	NA	NA	NA	NA	NA	NA
MTE262	0.058184	0.438939	0.496746	0.539162	1.1026	0.012915
MTE263	0.565794	0.676401	0.66953	0.662199	1.06698	0.115184
MTE264	0.299381	0.698731	0.718245	0.734389	1.0502	0.0359162
MTE265	0.176084	0.522936	0.546861	0.567428	-1.09657	0.0377542
MTE266	0.105782	0.655665	0.708014	0.741956	1.04856	0.0114719
MTE267	0.181277	0.551031	0.57672	0.598377	-1.13612	0.0538905
MTE268	0.883078	0.916923	0.91459	0.912048	1.01548	0.119325
MTE269	0.327349	0.810832	0.832177	0.847616	1.02733	0.0219762
MTE270	0.0836299	0.382097	0.416185	0.444748	1.14554	0.0258998
MTE271	0.166327	0.627429	0.662634	0.689384	-1.0604	0.022621
MTE272	0.928034	0.896587	0.886937	0.873956	-1.02242	0.281704
MTE273	0.671661	0.635719	0.61485	0.589857	1.08654	0.211219
MTE274	NA	NA	NA	NA	NA	NA
MTE275	0.351222	0.707798	0.722583	0.735323	1.05411	0.0467852
MTE276	0.577397	0.789611	0.793439	0.797066	1.03714	0.0672552
MTE277	0.340512	0.512434	0.510191	0.507915	1.11381	0.0921303
MTE278	0.0653423	0.36905	0.410345	0.443828	1.14105	0.019607
MTE279	NA	NA	NA	NA	NA	NA
MTE280	0.176807	0.588554	0.618624	0.642873	-1.07189	0.0285555
MTE281	0.0137013	0.617632	0.745614	0.796046	-1.03734	0.00113855
MTE282	0.496115	0.506495	0.488349	0.467912	-1.13002	0.174213
MTE283	0.86541	0.884962	0.879739	0.873733	-1.02246	0.149284
MTE284	0.746891	0.740548	0.725798	0.708197	1.05603	0.187302
MTE285	0.45692	0.471593	0.453957	0.434276	1.14573	0.171351
MTE286	0.56307	0.472534	0.445922	0.414408	1.16163	0.263861
MTE287	0.170396	0.31307	0.31406	0.315045	1.22722	0.0810087
MTE288	0.111885	0.762422	0.811008	0.838357	-1.03146	0.00793504
MTE289	0.057166	0.308105	0.34269	0.37178	1.18199	0.0217184
MTE290	0.0548764	0.569034	0.643109	0.688482	1.06266	0.00757649
MTE291	0.106024	0.331402	0.349173	0.365374	1.18638	0.0414484
MTE292	0.0847617	0.528447	0.581712	0.62	1.07799	0.0145103
MTE293	0.16333	0.387648	0.398494	0.408721	1.15927	0.0559336
MTE294	0.151136	0.469288	0.492985	0.513636	1.11554	0.0381667
MTE295	0.546407	0.832345	0.841192	0.848772	1.02711	0.0446787
MTE296	0.031083	0.301698	0.357248	0.399796	1.17021	0.0110806
MTE297	0.355377	0.280943	0.260899	0.238281	1.32485	0.253434
MTE298	0.219568	0.672794	0.701071	0.723067	1.05269	0.0266132
MTE299	0.233593	0.443621	0.448305	0.452863	1.13678	0.0710858
MTE300	0.215469	0.39782	0.400434	0.40301	1.16251	0.0764718
MTE301	0.407466	0.464038	0.450305	0.435369	1.14518	0.145631
MTE302	0.828474	0.862372	0.857055	0.85107	1.02668	0.137567
MTE303	NA	NA	NA	NA	NA	NA
MTE304	0.601812	0.558084	0.535343	0.50853	1.11357	0.214896
MTE305	0.204758	0.442033	0.451277	0.460045	1.13351	0.0602412
MTE306	0.308235	0.534253	0.538062	0.541776	1.10522	0.0759112
MTE307	0.273216	0.388599	0.382454	0.376092	1.17911	0.108773
MTE308	0.44642	0.843717	0.858313	0.869459	1.02325	0.0279956
MTE309	0.107483	0.442592	0.476003	0.503779	1.11538	0.0268526
MTE310	0.30377	0.582786	0.592036	0.600686	1.08624	0.0617041
MTE311	0.155717	0.316535	0.320493	0.324367	1.21868	0.0712151
MTE312	0.209018	0.490274	0.504143	0.516894	1.11047	0.0514968
MTE313	0.806179	0.878945	0.877254	0.87549	1.02213	0.100508
MTE314	0.282048	0.362811	0.353485	0.343659	1.20251	0.126242
MTE315	0.0191418	0.390166	0.488845	0.54991	1.11517	0.00472992
MTE316	0.217379	0.413753	0.417766	0.42169	1.1522	0.0726367
MTE317	0.0248249	0.364507	0.445301	0.500062	1.12674	0.00671651
MTE318	0.250286	0.503765	0.512325	0.52044	1.11296	0.0640339
MTE319	0.52325	0.554538	0.538459	0.520433	1.10918	0.160834
MTE320	0.375393	0.429512	0.415972	0.401309	1.1635	0.146171
MTE321	0.600057	0.465055	0.434889	0.398356	1.16523	0.303702
MTE322	0.384205	0.450908	0.438288	0.424673	1.15063	0.139535
MTE323	0.133454	0.618587	0.661204	0.692056	1.05977	0.0178176
MTE324	0.219529	0.558457	0.577623	0.594449	1.0852	0.0423691
MTE325	0.187675	0.66411	0.697212	0.722096	1.0529	0.0225835
MTE326	0.0363141	0.405457	0.477958	0.528177	1.10641	0.00833105
MTE327	NA	NA	NA	NA	NA	NA
MTE328	0.988721	0.982481	0.9807	0.978237	1.00379	0.307684
MTE329	0.0161513	0.357673	0.45655	0.51868	1.11362	0.00393967
MTE330	0.738997	0.690498	0.669876	0.64445	1.07148	0.229196
MTE331	0.756643	0.865648	0.865605	0.865563	1.02397	0.0850001
MTE332	0.0822334	0.641401	0.702338	0.739954	1.04899	0.00896256
MTE333	0.0504247	0.383111	0.437353	0.478603	1.12982	0.0139775
MTE334	0.557433	0.546344	0.526421	0.503496	1.11949	0.195236
MTE335	0.144359	0.471505	0.497219	0.519367	1.10957	0.0346086
MTE336	0.414712	0.469712	0.455781	0.440602	1.14261	0.146643
MTE337	0.311576	0.522143	0.524302	0.526431	1.11073	0.0807008
MTE338	0.199379	0.353486	0.353986	0.354485	1.19422	0.0829272
MTE339	0.0289148	0.282739	0.336002	0.377222	1.19396	0.0116244
MTE340	0.979297	0.979394	0.978132	0.976605	-1.0042	0.186066
MTE341	0.720856	0.681311	0.661289	0.636903	1.07345	0.218071
MTE342	0.191469	0.384304	0.389403	0.394361	1.1676	0.0693388
MTE343	0.910203	0.982604	0.984463	0.985831	1.00254	0.0258105
MTE344	0.00995808	0.212019	0.280267	0.329503	1.22194	0.00452365
MTE345	0.163701	0.569539	0.600848	0.626107	1.07633	0.0279047
MTE346	0.164543	0.300376	0.301026	0.301673	1.24923	0.0848759
MTE347	0.0859206	0.256772	0.269531	0.281438	1.27265	0.0472331
MTE348	0.146171	0.31412	0.319648	0.325014	1.21811	0.066528
MTE349	0.296436	0.52375	0.52798	0.532095	1.10867	0.0747836
MTE350	0.0377303	0.28108	0.324243	0.359154	1.1908	0.0149489
MTE351	0.0818237	0.362691	0.394407	0.421357	1.15238	0.0264444
MTE352	0.724635	0.80936	0.805239	0.800839	1.03639	0.111684
MTE353	0.0434162	0.469689	0.544596	0.594157	1.08528	0.00806477
MTE354	0.773386	0.813946	0.806662	0.798449	-1.03686	0.140468
MTE355	0.072582	0.327903	0.357907	0.383678	1.1742	0.0265293
MTE356	0.0857265	0.468975	0.514943	0.550393	1.09884	0.0184228
MTE357	0.529872	0.584456	0.570805	0.555676	1.09711	0.146889
MTE358	0.773011	0.749852	0.733883	0.714391	1.05463	0.206021
MTE359	0.0711656	0.198618	0.207059	0.215076	1.36962	0.050938
MTE360	0.807892	0.859103	0.85493	0.850361	-1.02682	0.122647
MTE361	0.331322	0.759597	0.779234	0.794728	1.03761	0.030526
MTE362	0.0303129	0.241182	0.28142	0.314271	1.22795	0.0141171
MTE363	0.0313372	0.312647	0.37069	0.414631	1.15599	0.0103028
Table 1. Titin exon array. Mouse titin exon expression data of soleus and EDL muscle. Exon nomenclature according to the human titin sequence retreived from Ensmbl ENSG00000155657

## Sheet: Soleus
Mouse Titin Exon	ANOVAp	ShrunkANOVAp	MixANOVAp	PoolANOVAp	Unlog	Std. Er.
MTE1	0.84363	0.794456	0.766718	0.723511	1.06083	0.380487
MTE2	0.501185	0.484438	0.45272	0.414322	1.15986	0.262868
MTE3	0.457619	0.468289	0.442845	0.413361	1.16029	0.234927
MTE4	0.010158	0.057811	0.082801	0.105903	1.53683	0.062964
MTE5	0.028295	0.084667	0.099268	0.113192	1.48266	0.097662
MTE6	0.158244	0.258325	0.263676	0.268913	1.24598	0.143886
MTE7	0.37569	0.528667	0.540681	0.551821	-1.11396	0.137755
MTE8	0.11158	0.192513	0.197245	0.201895	1.31241	0.143296
MTE9	0.059317	0.207642	0.253703	0.292564	1.22805	0.075587
MTE10	0.366608	0.394135	0.372809	0.34906	1.19243	0.219341
MTE11	0.019831	0.145759	0.219392	0.27677	-1.23978	0.04433
MTE12	0.059216	0.090709	0.088679	0.086635	1.58475	0.169253
MTE13	0.428753	0.440646	0.415358	0.386297	1.17296	0.233835
MTE14	0.894421	0.920077	0.919944	0.919811	-1.01665	0.158644
MTE15	0.17331	0.255573	0.254582	0.253587	1.25885	0.159833
MTE16	0.522884	0.595936	0.588532	0.580705	1.09943	0.17812
MTE17	0.962562	0.968916	0.968065	0.967141	1.00677	0.183739
MTE18	0.881116	0.917823	0.919789	0.921621	1.01627	0.137482
MTE19	0.682538	0.851908	0.873826	0.888218	1.02336	0.07035
MTE20	0.289444	0.712714	0.787014	0.823148	1.03757	0.037255
MTE21	0.462936	0.488373	0.466696	0.442007	1.14798	0.221123
MTE22	0.985739	0.983811	0.982084	0.979654	-1.00419	0.298745
MTE23	0.672975	0.674942	0.653675	0.6276	-1.08584	0.242777
MTE24	0.356579	0.588645	0.6223	0.648851	1.08001	0.093421
MTE25	0.790453	0.747663	0.718987	0.677614	1.0724	0.332733
MTE26	0.165661	0.481942	0.556959	0.606654	1.09647	0.062073
MTE27	0.665691	0.734914	0.732747	0.730526	1.05911	0.165168
MTE28	0.680059	0.554927	0.499112	0.41514	-1.1595	0.447057
MTE29	0.97529	0.962097	0.955554	0.943778	-1.01162	0.476998
MTE30	0.728873	0.667946	0.630681	0.577184	1.10049	0.346809
MTE31	0.731807	0.771422	0.764583	0.757091	1.05538	0.19752
MTE32	0.710209	0.666158	0.633083	0.587716	1.10231	0.3282
MTE33	0.831335	0.826949	0.813183	0.795504	-1.04381	0.255618
MTE34	0.697468	0.553749	0.493613	0.400009	-1.16641	0.494719
MTE35	0.822902	0.846508	0.840846	0.834508	-1.03678	0.204783
MTE36	0.857626	0.841807	0.826118	0.804591	-1.04174	0.290029
MTE37	0.324486	0.402333	0.393969	0.385244	1.18268	0.186826
MTE38	0.503391	0.582948	0.576737	0.570239	1.10262	0.174173
MTE39	0.206684	0.196339	0.174112	0.149933	1.39273	0.259339
MTE40	0.290862	0.190283	0.15408	0.112542	1.48468	0.400845
MTE41	0.241778	0.207153	0.179521	0.148784	1.39499	0.292014
MTE42	0.799869	0.788255	0.770104	0.74631	-1.0553	0.268831
MTE43	0.498439	0.796975	0.839914	0.86364	1.03143	0.054454
MTE44	NA	NA	NA	NA	NA	NA
MTE45	NA	NA	NA	NA	NA	NA
MTE46	NA	NA	NA	NA	NA	NA
MTE47	0.744366	0.707726	0.678511	0.638319	1.08288	0.307182
MTE48	NA	NA	NA	NA	NA	NA
MTE49	NA	NA	NA	NA	NA	NA
MTE50	NA	NA	NA	NA	NA	NA
MTE51	0.748957	0.714382	0.686041	0.647147	1.08047	0.304442
MTE52	0.455374	0.563588	0.564073	0.564557	-1.10437	0.155957
MTE53	0.997129	0.997471	0.997362	0.997238	1.00057	0.201415
MTE54	0.752883	0.739299	0.717662	0.689554	1.06933	0.26812
MTE55	0.565082	0.56529	0.539214	0.507802	1.12305	0.245111
MTE56	0.492232	0.700759	0.728036	0.748999	1.0574	0.096608
MTE57	0.352737	0.404004	0.388542	0.371809	-1.18023	0.19908
MTE58	0.619841	0.624558	0.601671	0.574014	-1.10146	0.239849
MTE59	0.169381	0.234502	0.229313	0.224018	-1.31863	0.189162
MTE60	0.609392	0.533557	0.488898	0.428335	-1.15373	0.343796
MTE61	0.607104	0.452394	0.391205	0.303509	-1.22044	0.475651
MTE62	0.363024	0.391794	0.370797	0.347465	-1.19332	0.218203
MTE63	0.882715	0.889987	0.883552	0.875838	1.02601	0.221838
MTE64	0.395741	0.689277	0.735701	0.76607	-1.05316	0.06967
MTE65	0.370456	0.399959	0.379061	0.355815	-1.1887	0.217631
MTE66	0.76318	0.708381	0.674514	0.625219	-1.08651	0.347228
MTE67	0.548714	0.509718	0.473182	0.427034	-1.15429	0.289439
MTE68	0.3898	0.361709	0.328156	0.288687	-1.23085	0.275101
MTE69	0.583863	0.626129	0.612379	0.596992	1.09459	0.201462
MTE70	0.378569	0.314376	0.275129	0.228266	1.28282	0.32033
MTE71	0.436351	0.423886	0.392956	0.356441	1.18835	0.257989
MTE72	0.693393	0.708433	0.692093	0.672658	1.07369	0.225172
MTE73	0.723436	0.793425	0.794682	0.795917	1.04371	0.151667
MTE74	NA	NA	NA	NA	NA	NA
MTE75	NA	NA	NA	NA	NA	NA
MTE76	0.846299	0.787716	0.756963	0.707265	1.06812	0.432193
MTE77	0.512836	0.586654	0.57914	0.5712	1.10232	0.178152
MTE78	0.94506	0.941709	0.936458	0.929473	1.01462	0.269039
MTE79	0.179291	0.277144	0.280061	0.282943	1.24788	0.157268
MTE80	NA	NA	NA	NA	NA	NA
MTE81	0.918785	0.875783	0.854693	0.817164	1.03891	0.477853
MTE82	0.676029	0.399489	0.319208	0.194737	1.32147	0.830385
MTE83	0.340521	0.112835	0.078124	0.038991	2.0407	0.829438
MTE84	0.8805	0.820527	0.791179	0.740233	1.05676	0.467934
MTE85	0.591335	0.50884	0.462428	0.399757	-1.16652	0.350922
MTE86	0.366076	0.712289	0.76922	0.80186	-1.04236	0.051636
MTE87	0.248654	0.236264	0.211046	0.183151	1.33727	0.260401
MTE88	NA	NA	NA	NA	NA	NA
MTE89	0.796574	0.867973	0.87375	0.87883	-1.02537	0.123011
MTE90	0.408872	0.589554	0.609229	0.626322	1.0862	0.115091
MTE91	NA	NA	NA	NA	NA	NA
MTE92	0.923232	0.969264	0.974936	0.978307	1.00446	0.059003
MTE93	0.338826	0.33159	0.303345	0.271186	1.24416	0.252878
MTE94	NA	NA	NA	NA	NA	NA
MTE95	0.327277	0.406028	0.397863	0.389352	-1.17148	0.177572
MTE96	0.326947	0.480776	0.493415	0.505173	1.12397	0.13101
MTE97	0.648856	0.664941	0.646614	0.624909	1.08659	0.225904
MTE98	0.389674	0.406094	0.381981	0.35467	1.18932	0.229567
MTE99	0.350362	0.601247	0.639826	0.669013	-1.08381	0.096087
MTE100	0.574494	0.688137	0.693855	0.699269	1.06686	0.140412
MTE101	0.875487	0.911764	0.913263	0.914689	1.01773	0.142859
MTE102	0.386433	0.473542	0.467347	0.460928	-1.14038	0.172461
MTE103	0.350387	0.496969	0.507285	0.516991	1.11987	0.135168
MTE104	0.629199	0.656763	0.640818	0.622423	-1.08729	0.213829
MTE105	0.496365	0.480318	0.448721	0.410558	-1.16155	0.262066
MTE106	0.853145	0.889362	0.889395	0.889428	-1.0231	0.156897
MTE107	0.316627	0.345924	0.325859	0.303826	-1.23214	0.227507
MTE108	0.470093	0.751922	0.793746	0.819711	1.03834	0.061418
MTE109	0.011254	0.077621	0.117654	0.152889	1.38703	0.050499
MTE110	0.533443	0.61744	0.613442	0.609315	-1.09101	0.168462
MTE111	0.713144	0.770464	0.7676	0.764627	-1.05096	0.169334
MTE112	0.557241	0.460003	0.410449	0.34415	1.1952	0.368377
MTE113	0.30915	0.428593	0.431776	0.434906	-1.15094	0.150082
MTE114	0.069266	0.27058	0.337369	0.388637	-1.18093	0.066657
MTE115	0.482159	0.418208	0.376093	0.323269	-1.20762	0.317933
MTE116	0.241911	0.211589	0.184428	0.154251	-1.38447	0.285491
MTE117	0.408783	0.341957	0.301111	0.251575	-1.26063	0.322312
MTE118	0.619996	0.558522	0.517633	0.462769	-1.13966	0.324622
MTE119	0.423008	0.391593	0.356762	0.31517	-1.21274	0.27853
MTE120	0.320992	0.321208	0.294942	0.265369	-1.24886	0.24511
MTE121	0.921572	0.891208	0.874858	0.847889	-1.03209	0.409596
MTE122	0.579269	0.647109	0.640379	0.633248	-1.08427	0.177973
MTE124	0.41831	0.481333	0.468916	0.455562	1.1425	0.190034
MTE125	0.081819	0.237366	0.276915	0.310888	1.21552	0.085906
MTE126	0.100085	0.364006	0.442267	0.497306	-1.13967	0.064628
MTE127	0.007275	0.097375	0.180688	0.244507	-1.26703	0.029284
MTE128	0.385839	0.311161	0.270126	0.22076	-1.2907	0.33451
MTE129	0.336975	0.264405	0.226317	0.181626	-1.33946	0.336637
MTE130	0.366085	0.339782	0.307176	0.269206	-1.24574	0.27348
MTE131	0.520876	0.56595	0.550749	0.53383	-1.12011	0.211977
MTE132	0.366186	0.468894	0.466914	0.464912	-1.13883	0.16184
MTE133	0.89987	0.923679	0.923402	0.923123	-1.01674	0.168248
MTE134	0.215532	0.125643	0.098294	0.068206	-1.69359	0.424898
MTE135	0.110668	0.107156	0.093876	0.079985	-1.61905	0.252733
MTE136	0.393331	0.465892	0.455827	0.445171	-1.14668	0.182964
MTE137	0.26344	0.24433	0.217275	0.187089	-1.33173	0.268368
MTE137.5	0.341512	0.276109	0.238564	0.194498	-1.32178	0.325269
MTE138	0.062114	0.132371	0.141941	0.151201	-1.39026	0.124341
MTE139	0.159004	0.308567	0.329647	0.348909	-1.19251	0.115547
MTE140	0.1826	0.161613	0.140021	0.116669	-1.47221	0.278064
MTE141	0.164655	0.16578	0.14824	0.129546	-1.43754	0.243648
MTE142	0.173549	0.082021	0.061122	0.038728	-2.04593	0.497488
MTE143	0.068499	0.104125	0.101843	0.099544	-1.52944	0.16926
MTE144	0.085891	0.110677	0.103977	0.097124	-1.57158	0.204567
MTE145	0.484211	0.395558	0.34884	0.289291	-1.23041	0.351336
MTE146	0.340585	0.333146	0.30481	0.272525	-1.2431	0.253082
MTE147	0.003858	0.042453	0.076947	0.107963	-1.52937	0.038183
MTE148	0.237369	0.184241	0.155309	0.123063	-1.45425	0.324027
MTE148.5	0.022074	0.129061	0.18301	0.228034	-1.28306	0.054329
MTE149	0.055225	0.120174	0.129388	0.138318	-1.41696	0.123325
MTE150	0.157779	0.516574	0.604954	0.657737	-1.07763	0.048821
MTE150.5	0.219737	0.11898	0.09151	0.061299	-1.74869	0.457003
MTE151	0.202477	0.183102	0.160075	0.134986	-1.42452	0.27305
MTE152	0.073695	0.130499	0.133325	0.136123	-1.4219	0.146059
MTE153	0.145857	0.138003	0.120948	0.102839	-1.51721	0.25892
MTE154	0.033788	0.120478	0.148516	0.174034	-1.3708	0.08583
MTE155	0.095891	0.09258	0.080823	0.068597	-1.73467	0.265572
MTE156	0.032247	0.041009	0.037876	0.034712	-2.13511	0.201415
MTE157	0.05553	0.067185	0.061613	0.055941	-1.79957	0.208536
MTE158	NA	NA	NA	NA	NA	NA
MTE158.5	NA	NA	NA	NA	NA	NA
MTE159	0.274927	0.549807	0.598381	0.634006	-1.08834	0.082026
MTE160	NA	NA	NA	NA	NA	NA
MTE161	NA	NA	NA	NA	NA	NA
MTE162	NA	NA	NA	NA	NA	NA
MTE163	NA	NA	NA	NA	NA	NA
MTE163.5	NA	NA	NA	NA	NA	NA
MTE164.5	0.469992	0.704776	0.737794	0.761746	1.05164	0.082179
MTE165.5	0.068228	0.250567	0.308719	0.355145	1.18906	0.068828
MTE168	NA	NA	NA	NA	NA	NA
MTE169	NA	NA	NA	NA	NA	NA
MTE169.5	NA	NA	NA	NA	NA	NA
MTE171	NA	NA	NA	NA	NA	NA
MTE172	0.307132	0.697512	0.766019	0.802367	1.04435	0.046074
MTE173	0.135588	0.296208	0.324538	0.349701	1.19207	0.104248
MTE182	NA	NA	NA	NA	NA	NA
MTE183	NA	NA	NA	NA	NA	NA
MTE184	NA	NA	NA	NA	NA	NA
MTE185	0.698479	0.664504	0.633874	0.59296	-1.09577	0.295037
MTE186	0.005111	0.026622	0.037263	0.047562	-1.95969	0.069662
MTE187	NA	NA	NA	NA	NA	NA
MTE188	NA	NA	NA	NA	NA	NA
MTE189	0.324966	0.378111	0.363472	0.347748	1.19316	0.196912
MTE190	NA	NA	NA	NA	NA	NA
MTE191	0.209786	0.370946	0.390765	0.408822	1.16234	0.119017
MTE192	0.802757	0.917823	0.932286	0.941085	-1.01279	0.064414
MTE193	0.180781	0.601557	0.696291	0.745042	-1.05561	0.038646
MTE194	NA	NA	NA	NA	NA	NA
MTE195	0.011143	0.544204	0.544204	0.544204	1.24404	0.005515
MTE196	0.460397	0.61041	0.622453	0.633443	1.08422	0.128704
MTE197	NA	NA	NA	NA	NA	NA
MTE198	0.656204	0.602322	0.564403	0.51305	1.12123	0.318833
MTE199	NA	NA	NA	NA	NA	NA
MTE200	0.796385	0.894428	0.90605	0.914522	1.01864	0.090586
MTE201	NA	NA	NA	NA	NA	NA
MTE202	NA	NA	NA	NA	NA	NA
MTE203	NA	NA	NA	NA	NA	NA
MTE204	0.887418	0.891637	0.884581	0.875938	1.02599	0.231042
MTE205	NA	NA	NA	NA	NA	NA
MTE206	0.597932	0.558315	0.522572	0.476459	-1.13441	0.292984
MTE207	0.000361	0.023045	0.087104	0.140016	-1.43727	0.00995
MTE208	NA	NA	NA	NA	NA	NA
MTE209	0.187144	0.153595	0.130531	0.105471	-1.50789	0.30023
MTE210	0.032387	0.04968	0.048217	0.046746	-1.91069	0.172319
MTE211	0.052081	0.055388	0.049112	0.042711	-2.03949	0.244298
MTE212	0.608088	0.783066	0.804863	0.821183	1.03801	0.089328
MTE212.5	0.521535	0.607101	0.603129	0.599034	1.0988	0.176394
MTE213	0.496353	0.49852	0.471413	0.439374	-1.14907	0.243148
MTE214	0.86192	0.899299	0.900222	0.901121	1.0206	0.149227
MTE215	NA	NA	NA	NA	NA	NA
MTE216	0.694125	0.828802	0.844486	0.856523	-1.03383	0.105634
MTE217	0.056111	0.043852	0.036147	0.028254	-2.32796	0.301614
MTE218	0.000727	0.002965	0.00383	0.004693	-8.25641	0.082143
MTE219	0.001451	0.002223	0.002137	0.002051	-24.5157	0.176031
MTE220	0.007986	0.007719	0.006629	0.005535	-6.97722	0.25197
MTE221	0.006325	0.014	0.014938	0.015874	-3.12084	0.131202
MTE222	0.00049	0.029006	0.104134	0.16415	-1.36684	0.009985
MTE223	0.34004	0.367523	0.346562	0.323368	-1.20756	0.219029
MTE224	NA	NA	NA	NA	NA	NA
MTE225	0.029208	0.074802	0.083827	0.092592	-1.55762	0.111727
MTE226	0.118738	0.218503	0.228244	0.23763	-1.27352	0.132283
MTE227	0.042666	0.086964	0.091608	0.096181	-1.54264	0.133493
MTE228	0.822892	0.859656	0.857838	0.855947	1.03183	0.177637
MTE229	0.518627	0.75515	0.78831	0.81085	-1.04426	0.080447
MTE230	0.067399	0.435585	0.571862	0.641295	-1.09024	0.034108
MTE231	0.924638	0.965771	0.970787	0.974095	-1.00533	0.071791
MTE232	0.121559	0.446416	0.537163	0.594218	-1.10029	0.053034
MTE233	0.641673	0.708666	0.704618	0.700397	-1.06657	0.171305
MTE234	0.261429	0.565827	0.623037	0.662316	1.07641	0.068565
MTE235	0.171523	0.346048	0.373995	0.39864	1.16705	0.106524
MTE236	0.940812	0.946137	0.943366	0.940119	-1.01239	0.211836
MTE237	0.214348	0.397002	0.423224	0.446298	-1.14622	0.10963
MTE238	0.87162	0.940003	0.948343	0.953957	1.00951	0.07455
MTE239	0.735257	0.884154	0.903196	0.915153	-1.01763	0.064941
MTE240	0.37678	0.398043	0.375158	0.349448	-1.19221	0.225055
MTE241	0.12452	0.401405	0.475197	0.527061	1.11646	0.062034
MTE242	0.816537	0.805433	0.788524	0.766271	1.05058	0.269681
MTE243	0.662102	0.6119	0.575187	0.525595	-1.11695	0.314286
MTE244	0.563532	0.584648	0.564224	0.540457	1.11204	0.223313
MTE245	0.743682	0.805352	0.805511	0.805669	-1.0415	0.156419
MTE246	0.623037	0.701083	0.699209	0.6973	-1.07076	0.171363
MTE247	0.104852	0.333494	0.395854	0.443455	1.14739	0.069845
MTE248	0.519268	0.464873	0.42453	0.373429	1.18893	0.322017
MTE249	0.995339	0.996445	0.996429	0.996413	1.00074	0.16111
MTE250	0.015081	0.219097	0.375541	0.464637	1.13893	0.023313
MTE251	0.338871	0.342373	0.316256	0.286758	1.24488	0.253583
MTE252	0.415532	0.753156	0.805413	0.834272	1.03509	0.048848
MTE253	0.239806	0.29057	0.277916	0.264559	1.24952	0.194218
MTE254	0.1895	0.259802	0.25454	0.249164	1.26278	0.17201
MTE255	0.508437	0.489082	0.456812	0.417536	1.16678	0.278762
MTE256	0.772023	0.816853	0.81403	0.811072	-1.04028	0.17204
MTE257	0.526631	0.654144	0.661855	0.669072	1.07463	0.136631
MTE258	0.632296	0.708241	0.706234	0.704186	1.06562	0.163977
MTE259	0.701126	0.662439	0.630543	0.587472	-1.0974	0.302744
MTE260	0.707136	0.692844	0.668484	0.637224	1.08318	0.266112
MTE261	0.243439	0.229965	0.204896	0.177208	1.34599	0.261989
MTE262	0.571187	0.631907	0.622838	0.613065	-1.09453	0.194126
MTE263	0.492496	0.524687	0.505283	0.483291	1.13186	0.214538
MTE264	0.376791	0.440794	0.42845	0.41525	-1.16785	0.198635
MTE265	0.324615	0.365075	0.347397	0.328154	-1.20462	0.207369
MTE266	0.189177	0.46307	0.520977	0.563452	1.10471	0.073335
MTE267	0.890756	0.874421	0.860852	0.841656	-1.03346	0.305514
MTE268	0.070192	0.297608	0.376268	0.433307	1.15957	0.059784
MTE269	0.041965	0.283685	0.396782	0.46907	1.14438	0.041165
MTE270	0.980236	0.994781	0.996387	0.99707	-1.00067	0.034693
MTE271	0.315468	0.448029	0.454801	0.461329	1.14022	0.142558
MTE272	0.735737	0.783592	0.779378	0.774908	1.05099	0.185145
MTE273	0.611269	0.785121	0.806752	0.822939	1.03761	0.089277
MTE274	0.509728	0.52114	0.49664	0.467948	1.13765	0.233886
MTE275	0.615554	0.681808	0.676264	0.67042	1.07428	0.175504
MTE276	0.622639	0.608609	0.580556	0.545454	1.11042	0.262206
MTE277	NA	NA	NA	NA	NA	NA
MTE278	0.236233	0.239834	0.217853	0.193847	1.32263	0.241081
MTE279	0.740458	0.721594	0.697626	0.666167	1.07539	0.275904
MTE280	0.859849	0.74501	0.696029	0.600494	-1.09356	0.644616
MTE281	0.267151	0.332738	0.322591	0.311966	1.21482	0.184303
MTE282	0.679947	0.779946	0.786835	0.793114	1.04657	0.137455
MTE283	0.985164	0.985015	0.983844	0.982346	1.00363	0.249153
MTE284	0.470381	0.501469	0.48136	0.458602	1.14129	0.215931
MTE285	0.51674	0.770914	0.807177	0.830329	-1.0403	0.073012
MTE286	0.591248	0.726345	0.738329	0.748865	1.05469	0.121288
MTE287	0.469687	0.573528	0.573126	0.572722	-1.10185	0.158186
MTE288	0.847644	0.83955	0.825706	0.807523	1.04108	0.266402
MTE289	0.957018	0.979642	0.982363	0.984221	1.00324	0.0768
MTE290	0.006307	0.29329	0.576477	0.66937	1.07833	0.008681
MTE291	0.101206	0.23737	0.263304	0.286759	1.23226	0.103913
MTE292	0.122842	0.310127	0.350937	0.385267	1.17347	0.089335
MTE293	0.91932	0.889176	0.872757	0.845893	-1.03253	0.40344
MTE294	NA	NA	NA	NA	NA	NA
MTE295	0.202947	0.38982	0.418401	0.443309	1.14745	0.106308
MTE296	0.755273	0.854192	0.864419	0.872758	1.02668	0.106415
MTE297	0.210124	0.519171	0.583844	0.627915	1.09635	0.072857
MTE298	0.761394	0.88437	0.899624	0.910092	-1.0187	0.076925
MTE299	0.245551	0.653712	0.733201	0.775027	-1.05096	0.04411
MTE300	0.76927	0.849839	0.856413	0.862193	1.02897	0.12285
MTE301	0.286744	0.279334	0.252963	0.223467	1.28781	0.253572
MTE302	0.542157	0.448976	0.400385	0.336155	1.19983	0.36088
MTE303	0.886458	0.924792	0.927497	0.929929	-1.01452	0.128693
MTE304	0.800787	0.8588	0.861407	0.863875	-1.0286	0.141518
MTE305	0.628344	0.707881	0.706681	0.705466	-1.0653	0.161192
MTE306	0.587704	0.656245	0.650075	0.64356	-1.08145	0.176501
MTE307	0.040634	0.275272	0.386379	0.458289	1.14881	0.041623
MTE308	0.429704	0.383394	0.345535	0.299719	1.22303	0.295836
MTE309	0.055909	0.15267	0.175059	0.195762	1.32014	0.098942
MTE310	0.04888	0.140062	0.162587	0.18343	1.35595	0.100861
MTE311	0.869074	0.800489	0.76754	0.709974	1.06417	0.480461
MTE312	NA	NA	NA	NA	NA	NA
MTE313	NA	NA	NA	NA	NA	NA
MTE314	NA	NA	NA	NA	NA	NA
MTE315	0.382208	0.462612	0.454599	0.446217	1.14626	0.17724
MTE316	0.395843	0.299813	0.255626	0.201858	1.31245	0.365849
MTE317	0.255328	0.436847	0.459943	0.480413	1.13293	0.114117
MTE318	NA	NA	NA	NA	NA	NA
MTE319	0.390027	0.303398	0.260627	0.208869	1.30404	0.351816
MTE320	0.165417	0.305603	0.322828	0.338833	1.19826	0.121793
MTE321	0.319139	0.535935	0.566546	0.591803	1.10104	0.105625
MTE322	0.924057	0.947124	0.948253	0.949313	1.01047	0.139521
MTE323	0.429864	0.456651	0.435001	0.410538	1.16156	0.220157
MTE324	0.534141	0.562088	0.542604	0.520263	1.11876	0.217441
MTE325	0.261262	0.232623	0.204391	0.172795	1.40187	0.31441
MTE326	0.080081	0.163712	0.174329	0.184551	1.35426	0.131863
MTE327	0.601978	0.678683	0.675443	0.672103	1.07383	0.167494
MTE328	NA	NA	NA	NA	NA	NA
MTE329	0.613137	0.747646	0.760312	0.771243	1.04941	0.117275
MTE330	NA	NA	NA	NA	NA	NA
MTE331	NA	NA	NA	NA	NA	NA
MTE332	NA	NA	NA	NA	NA	NA
MTE333	0.158786	0.353184	0.389722	0.420694	1.16531	0.100314
MTE334	0.929862	0.939631	0.937414	0.934932	-1.01347	0.194172
MTE335	0.702706	0.741285	0.732414	0.722564	-1.06413	0.203654
MTE336	NA	NA	NA	NA	NA	NA
MTE337	NA	NA	NA	NA	NA	NA
MTE338	NA	NA	NA	NA	NA	NA
MTE339	0.038671	0.149214	0.187701	0.221397	1.32176	0.081527
MTE340	0.290376	0.320886	0.301814	0.281039	1.23652	0.215037
MTE341	0.908905	0.934669	0.93553	0.936359	-1.01382	0.153086
MTE342	0.321765	0.282418	0.24937	0.21129	1.30123	0.291035
MTE343	0.267461	0.351156	0.345632	0.339964	1.19761	0.170944
MTE344	0.882803	0.983765	0.991628	0.993642	1.00137	0.011831
MTE345	0.465015	0.847655	0.897453	0.91755	-1.01797	0.02869
MTE346	NA	NA	NA	NA	NA	NA
MTE347	0.500847	0.480888	0.448393	0.408917	1.1623	0.266347
MTE348	0.625428	0.473306	0.412138	0.323107	1.20772	0.4766
MTE349	0.842003	0.861447	0.855854	0.849524	1.03173	0.19917
MTE350	0.94681	0.942899	0.937592	0.930463	1.01512	0.287366
MTE351	0.147467	0.303252	0.328002	0.350288	1.19174	0.10971
MTE352	0.821498	0.777509	0.750206	0.709525	1.06428	0.350346
MTE353	0.076639	0.114434	0.111628	0.108794	1.49667	0.171045
MTE354	0.566655	0.599469	0.582399	0.562942	-1.10487	0.211589
MTE355	0.22086	0.476013	0.524042	0.560899	1.10551	0.082328
MTE356	0.948776	0.971855	0.974376	0.976322	1.00487	0.096684
MTE357	0.116814	0.375426	0.44519	0.495819	-1.1273	0.064914
MTE358	NA	NA	NA	NA	NA	NA
MTE359	0.734695	0.727045	0.706187	0.679677	1.07187	0.257291
MTE360	0.917451	0.913494	0.905995	0.896132	1.02167	0.263976
MTE361	0.641159	0.75361	0.761874	0.769358	-1.04985	0.129091
MTE362	0.950052	0.932349	0.922461	0.906404	-1.01948	0.393576
MTE363	0.130986	0.265329	0.285039	0.303244	1.23256	0.121447
